# Supplementary material for: Hydrogenation of Furfural over Biomass-Based Electron-Deficient Co-NC Nanotube Catalyst
Source: MDPI journal article supplement (doi:10.3390/nano14090788), 2024-05-01
Supplement: s1 [file s1]

# Supporting Information

## Hydrogenation of furfural over biomass-based electron-deficient Co-NC nanotube catalyst

Zhu Zhu<sup>1</sup>, Guangyue Xu<sup>\*1</sup>

1. Hefei National Research Center for Physical Sciences at the Microscale, iChEM, CAS Key Laboratory of Urban Pollutant Conversion, Anhui Province Key Laboratory of Biomass Clean Energy, University of Science and Technology of China, Hefei 230026, China. Institute of Energy, Hefei Comprehensive National Science Center, Hefei 230031.

\*Email:

GY Xu: [craneyue@mail.ustc.edu.cn](mailto:craneyue@mail.ustc.edu.cn)

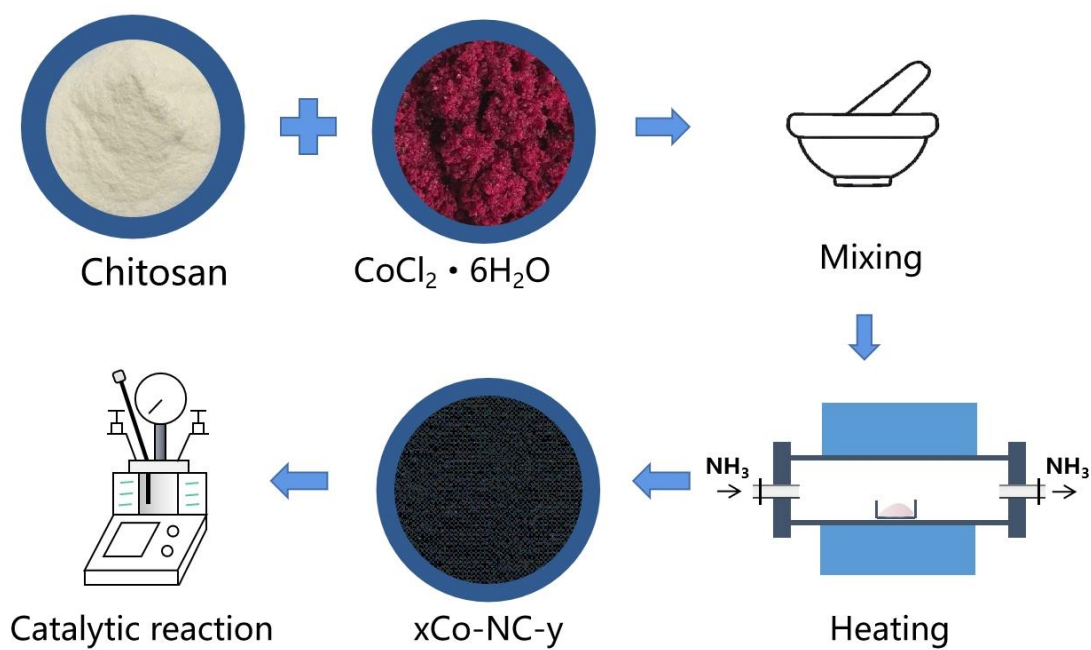

Figure S1. Synthesis procedure of Co-NC catalysts.

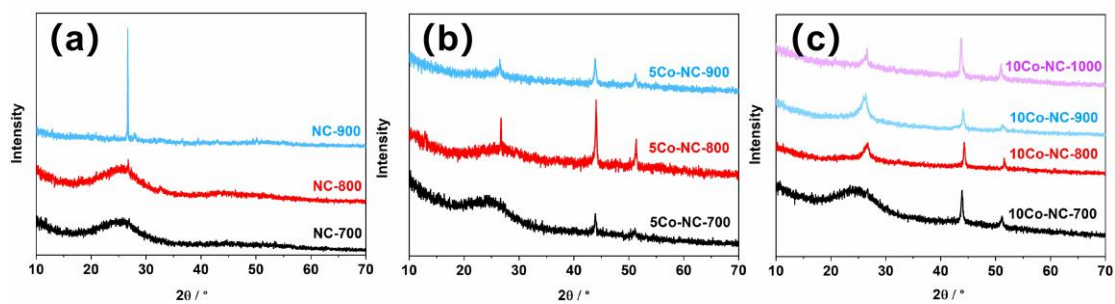

Figure S2. XRD patterns of Co-NC catalysts synthesized with various calcination temperatures and Co loadings.

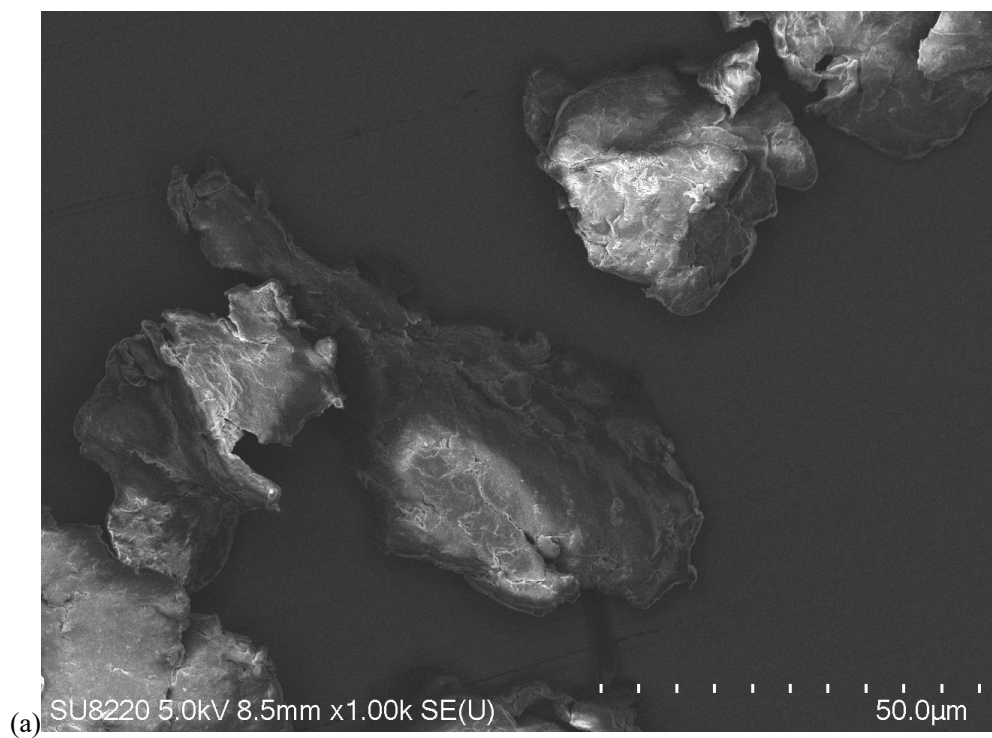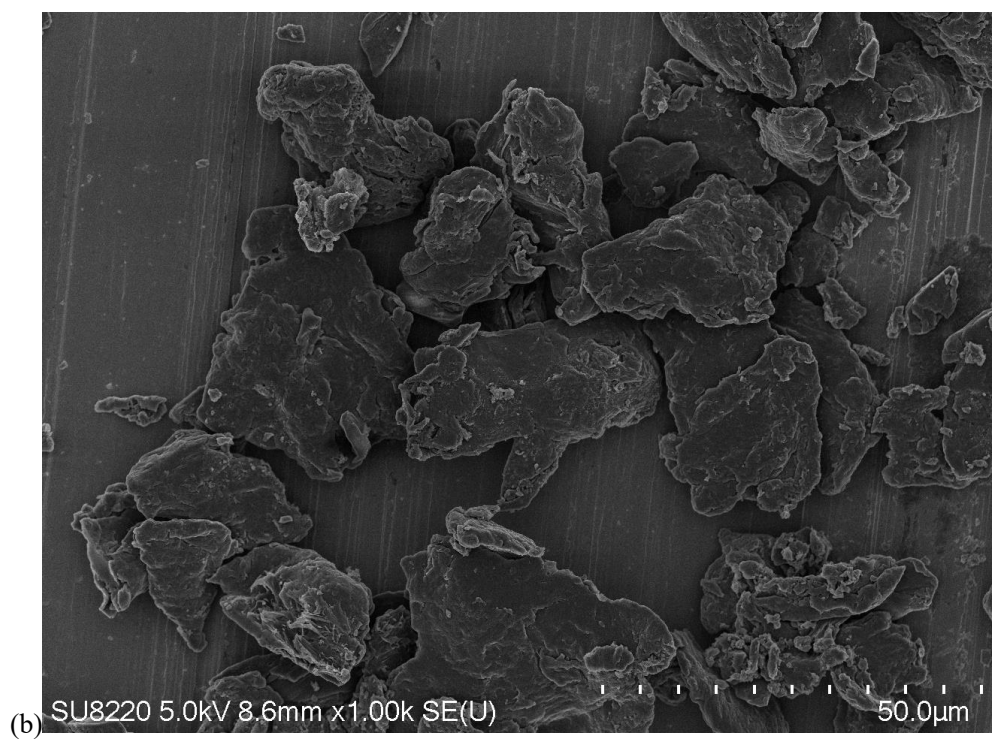

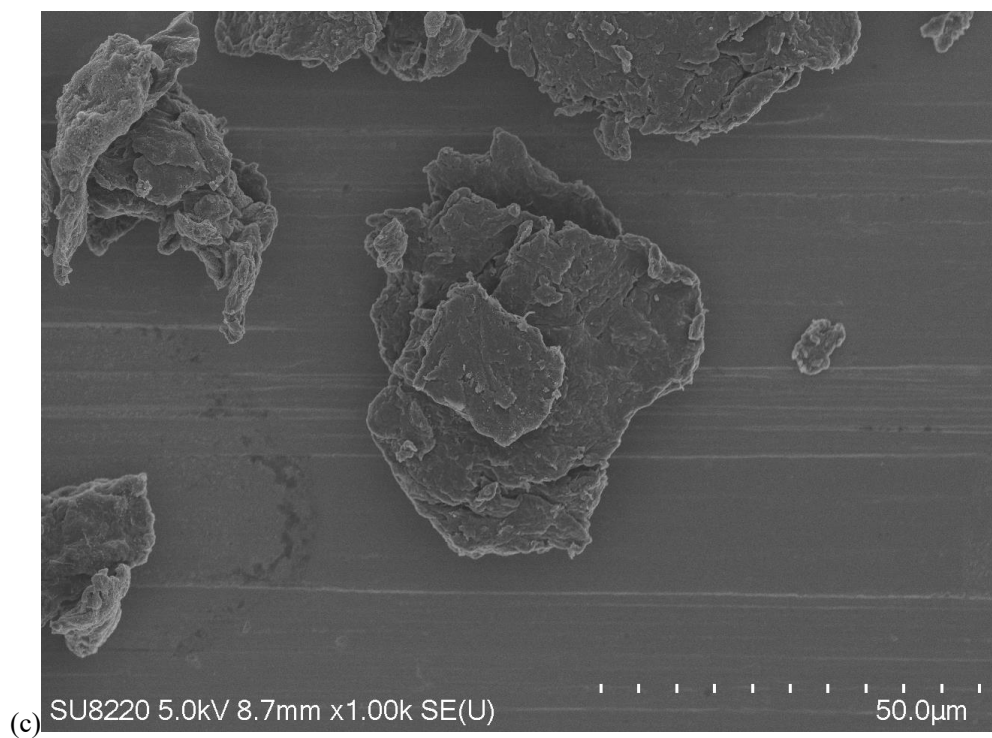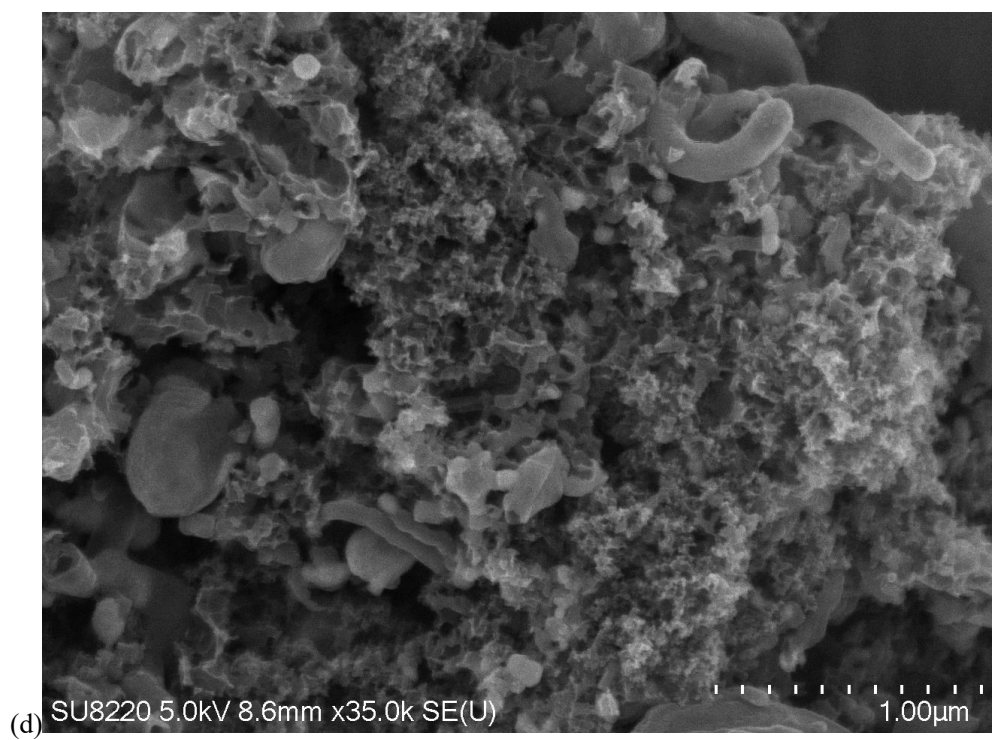

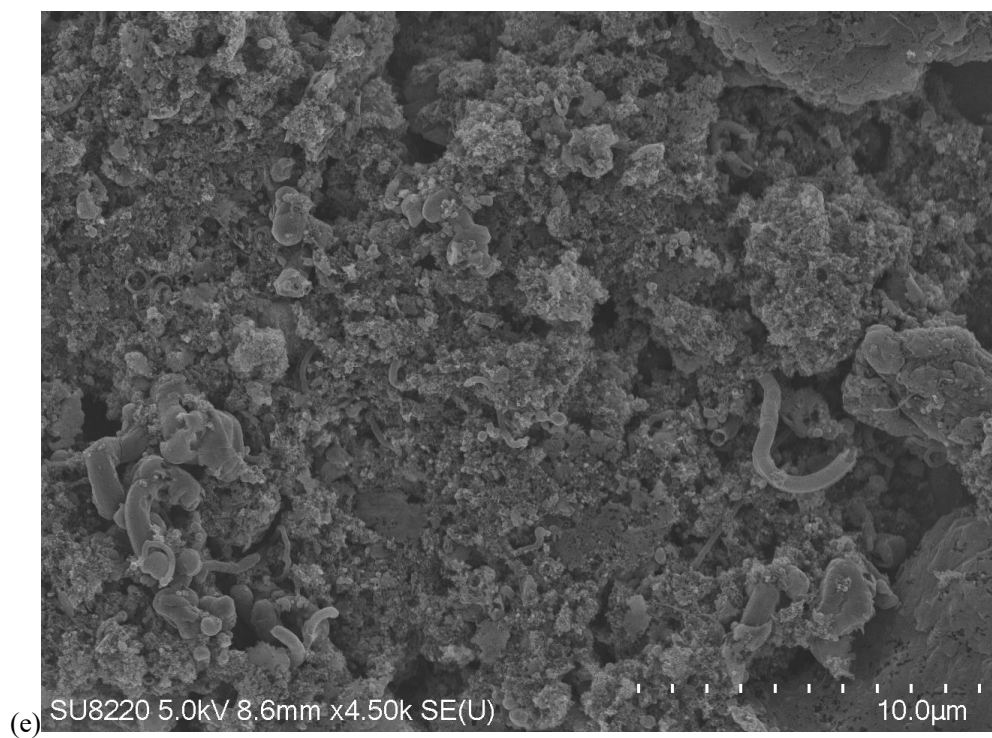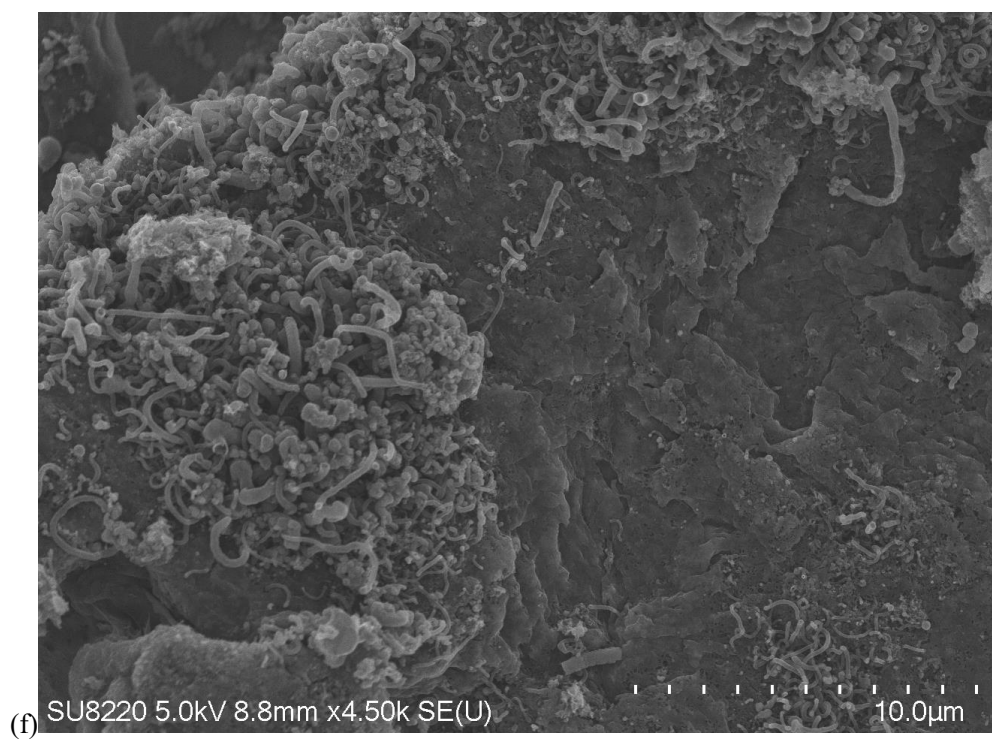

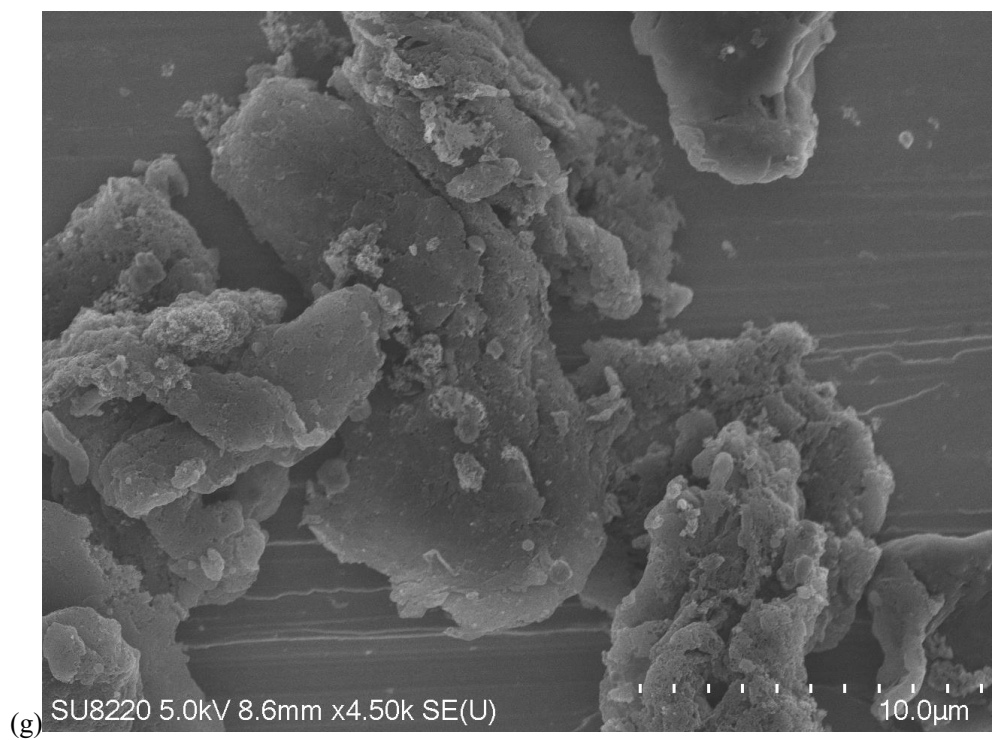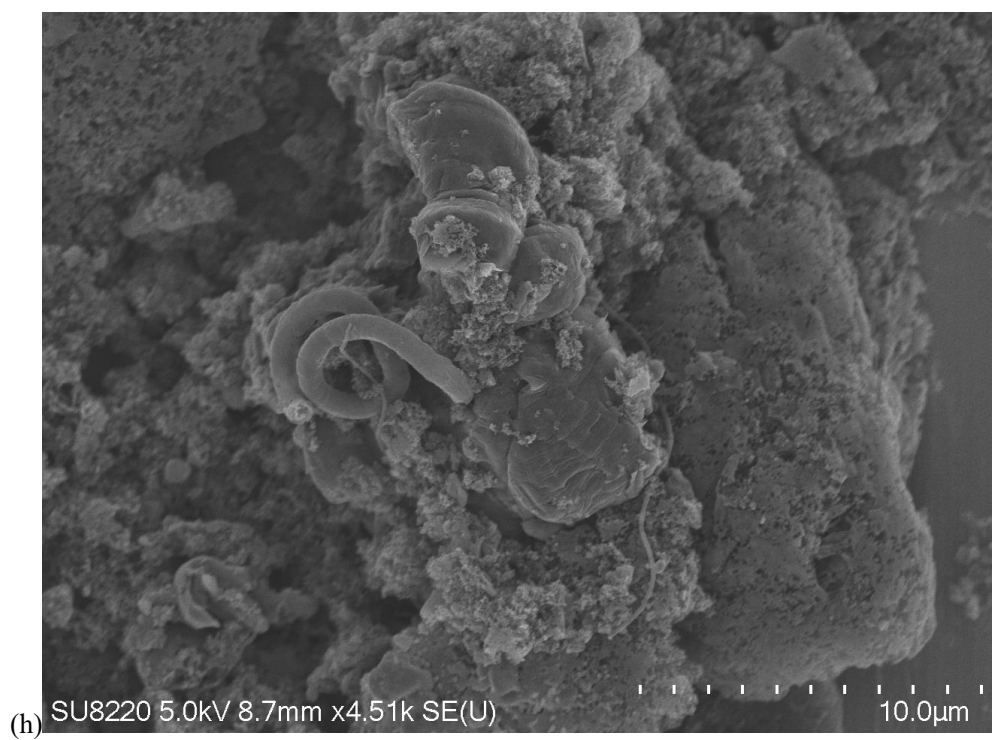



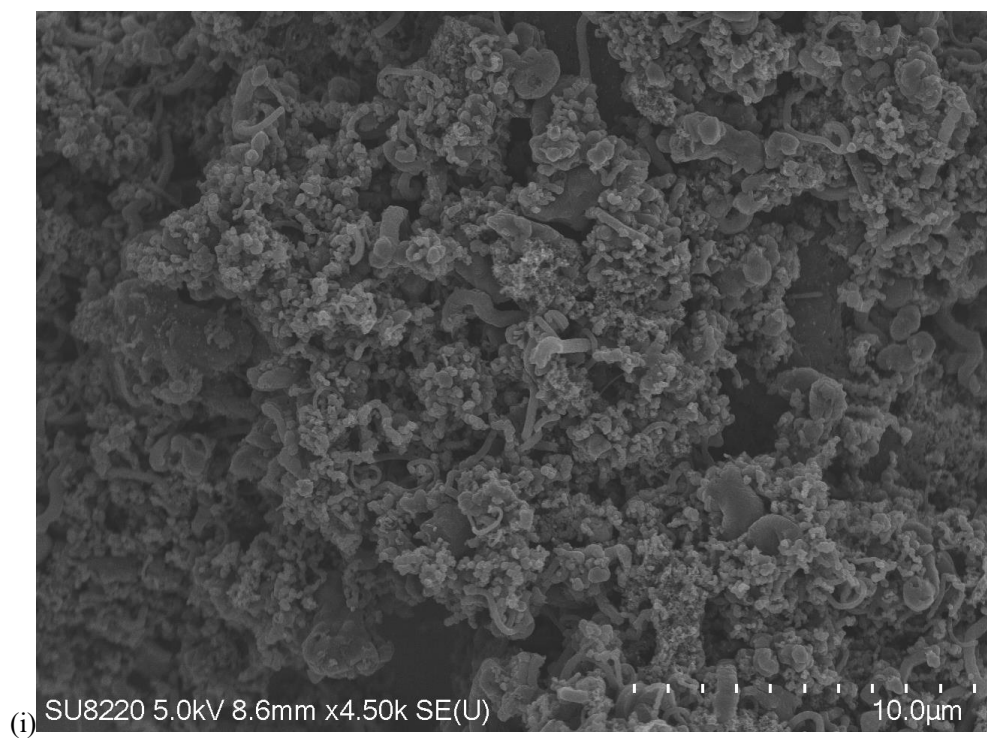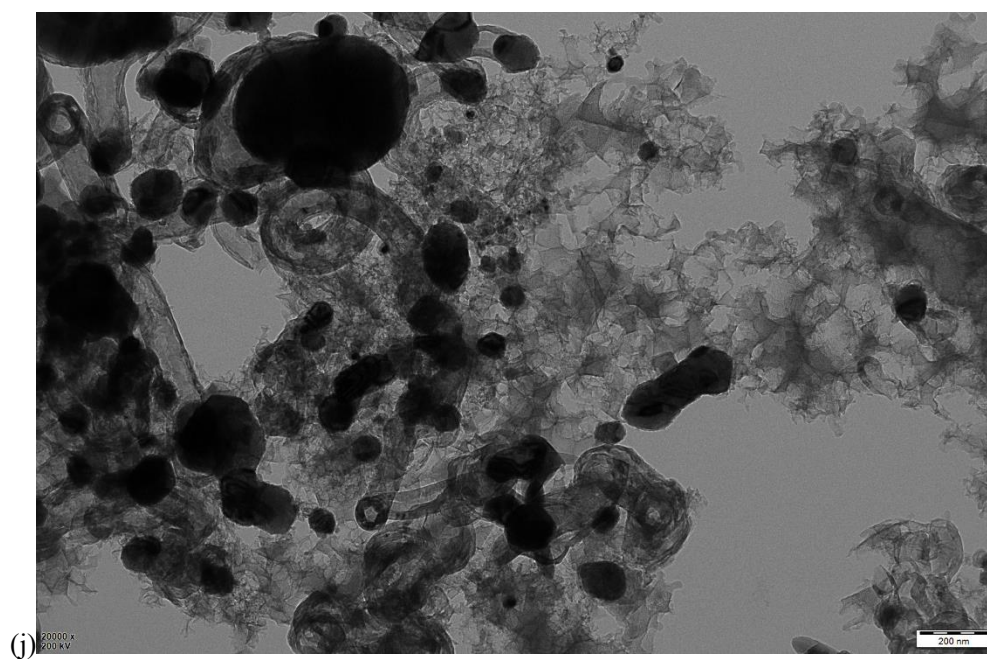

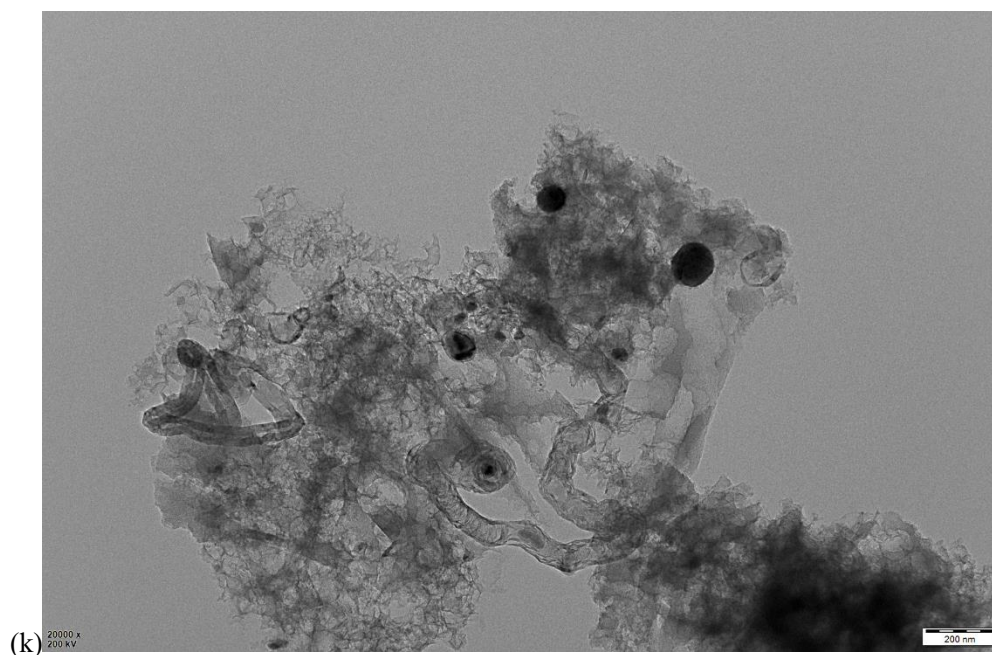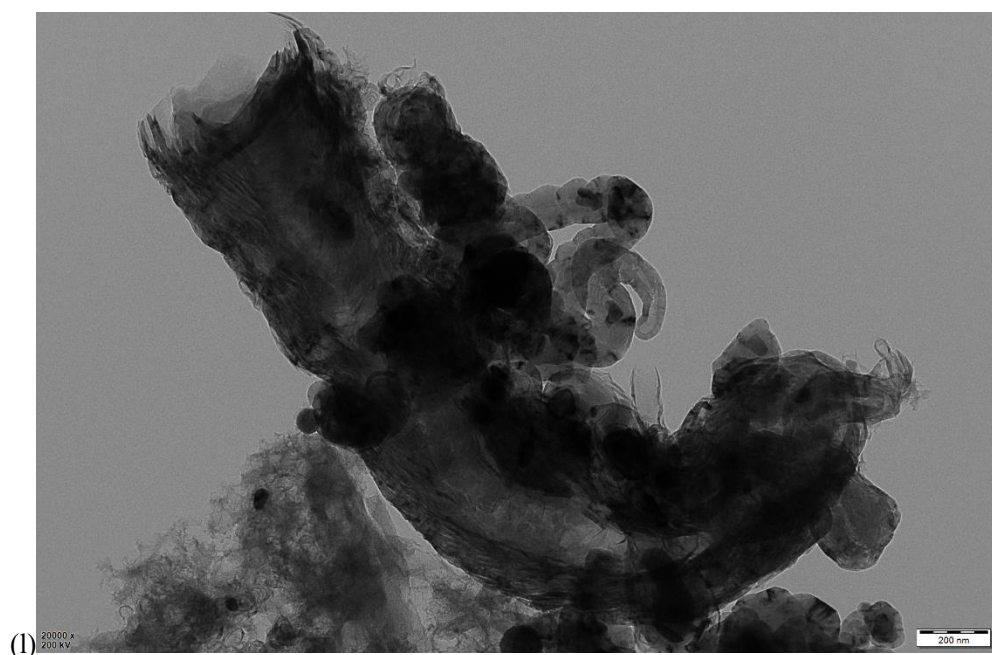

Figure S3. SEM images of (a) 7.5Co-NC-300, (b) 7.5Co-NC-500, (c) 7.5Co-NC-700, (d) 7.5Co-NC-800, (e) 7.5Co-NC-900, (f) 7.5Co-NC-1000, (g) 0Co-NC-900, (h) 5Co-NC-900, (i) 10Co-NC-900; and TEM images of (j) 7.5Co-NC-800, (k) 7.5Co-NC-900, (l) 7.5Co-NC-1000.

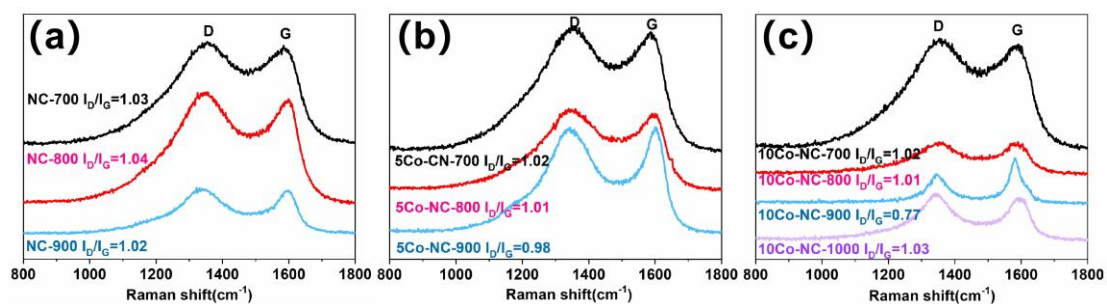



Figure S4. Raman spectra of Co-NC catalysts synthesized with various calcination temperatures and Co loadings.

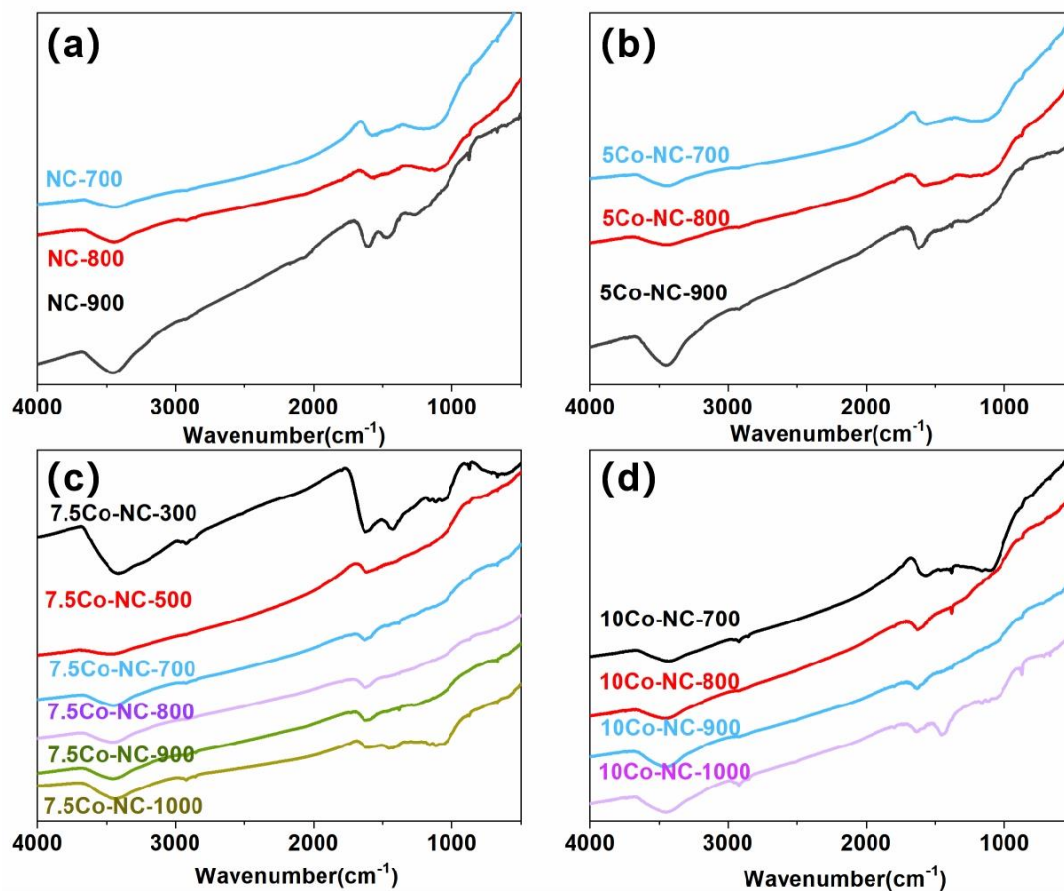

Figure S5. Infrared spectra of Co-NC catalysts synthesized with various calcination temperatures and Co loadings.

Table S1. The content of nitrogen in various catalysts.

| No. | Sample        | The content of nitrogen |
|-----|---------------|-------------------------|
| 1   | 5Co-NC-900    | 2.8%                    |
| 2   | 7.5Co-NC-300  | 8.3%                    |
| 3   | 7.5Co-NC-500  | 5.2%                    |
| 4   | 7.5Co-NC-700  | 3.2%                    |
| 5   | 7.5Co-NC-800  | 2.8%                    |
| 6   | 7.5Co-NC-900  | 2.7%                    |
| 7   | 7.5Co-NC-1000 | 2.1%                    |
| 8   | 10Co-NC-900   | 2.4%                    |
